# Supplementary material
Source: publisher figshare collection journal article supplement (https://brill.figshare.com/articles/dataset/_/25206497)
Supplement: Supplementary file 1 [file 1]

Table S4. Model evaluation

| **Last Glacial Maximum** | **GLM** | **MAXENT** | **GBM** | **GAM** |
| --- | --- | --- | --- | --- |
| ROC | .81 | .85 | .98 | .96 |
| TSS | .50 | .56 | .85 | .80 |
| KAPPA | .48 | .53 | .83 | .76 |
| **Mid-Holocene** |  |  |  |  |
| ROC | .80 | .80 | .97 | .90 |
| TSS | .49 | .65 | .80 | .68 |
| KAPPA | .44 | .51 | .79 | .65 |
| **CURRENT** |  |  |  |  |
| ROC | .77 | .85 | .98 | .94 |
| TSS | .40 | .55 | .85 | .79 |
| KAPPA | .35 | .53 | .85 | .78 |
| **FUTURE CCSM4.5** |  |  |  |  |
| ROC | .80 | .85 | .98 | .93 |
| TSS | .53 | .53 | .87 | .72 |
| KAPPA | .47 | .50 | .81 | .67 |
| **FUTURE CCSM6.0** |  |  |  |  |
| ROC | .80 | .84 | .98 | .92 |
| TSS | .52 | .56 | .88 | .69 |
| KAPPA | .44 | .53 | .83 | .68 |
| **FUTURE BCC-CSM4.5** |  |  |  |  |
| ROC | .79 | .82 | .97 | .93 |
| TSS | .45 | .52 | .83 | .70 |
| KAPPA | .43 | .43 | .83 | .67 |
| **FUTURE BCC-CSM6.0** |  |  |  |  |
| ROC | .79 | .82 | .97 | .95 |
| TSS | .45 | .51 | .82 | .76 |
| KAPPA | .44 | .42 | .80 | .70 |
