# Supplementary material
Source: publisher figshare collection journal article supplement (https://brill.figshare.com/articles/dataset/_/25206497)
Supplement: Supplementary file 1 [file 1]

# **Unraveling goitered gazelle (*Gazella subgutturosa*) diversification: insights from phylogeography and species distribution modeling**

*Mojgan Asadollahi* | ORCID: 0000-0002-9969-7121

Department of Biodiversity and Ecosystem Management, Environmental Sciences  
Research Institute, Shahid Beheshti University, G.C., Evin, Tehran, 1983963113, Iran

*Faraham Ahmadzadeh* | ORCID: 0000-0001-7152-8484

Department of Biodiversity and Ecosystem Management, Environmental Sciences  
Research Institute, Shahid Beheshti University, G.C., Evin, Tehran, 1983963113, Iran

*f\_ahmadzade@sbu.ac.ir*

*Nusha Keyghobadi* | ORCID: 0000-0002-7071-1292

Department of Biology, Biological & Geological Sciences Building, Western  
University, London, Ontario, N6A 5B7, Canada

**Supplementary material**

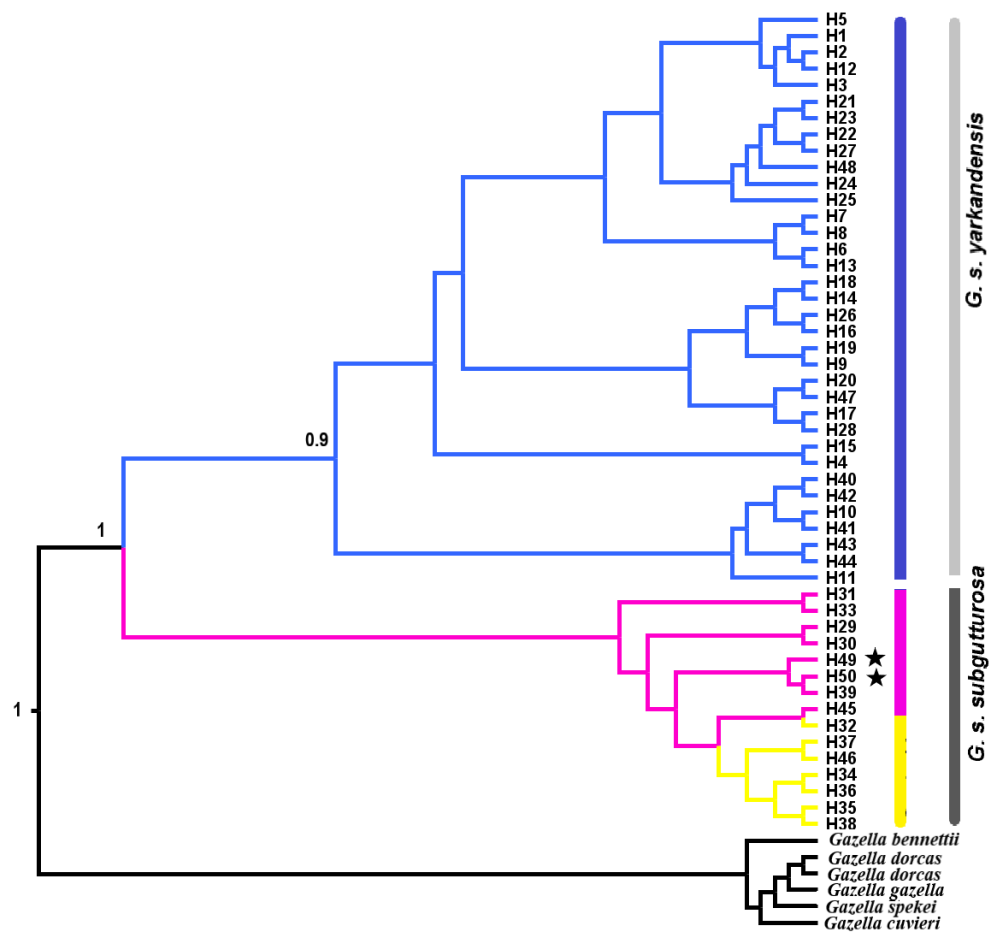

FIGURE S1
